# Supplementary material for: Clinical Targets for Continuous Glucose Monitoring Data Interpretation: Recommendations From the International Consensus on Time in Range
Source: Oxford University Press journal article supplement (doi:10.2337/dci19-0028), 2019-06-08
Supplement: dci190028supplementarydata.pdf [file dci190028supplementarydata.pdf]

SUPPLEMENTARY DATA

Supplementary Figure S1. Ambulatory Glucose Profile, with glucose values in mmol/L

**AGP Report**

Name \_\_\_\_\_

MRN \_\_\_\_\_

**GLUCOSE STATISTICS AND TARGETS**

**26 Feb 2019–10 Mar 2019** **13 days**  
**% Time CGM is Active** **99.9%**

| Glucose Ranges               | Targets [% of Readings (Time/Day)] |
|------------------------------|------------------------------------|
| Target Range 3.9–10.0 mmol/L | Greater than 70% (16h 48min)       |
| Below 3.9 mmol/L             | Less than 4% (58min)               |
| Below 3.0 mmol/L             | Less than 1% (14min)               |
| Above 10.0 mmol/L            | Less than 25% (6h)                 |
| Above 13.9 mmol/L            | Less than 5% (1h 12min)            |

Each 5% increase in time in range (3.9–10.0 mmol/L) is clinically beneficial.

**Average Glucose** **9.6 mmol/L**  
**Glucose Management Indicator (GMI)** **7.6%**  
**Glucose Variability** **49.5%**

Defined as percent coefficient of variation (%CV); target ≤36%

**TIME IN RANGES**

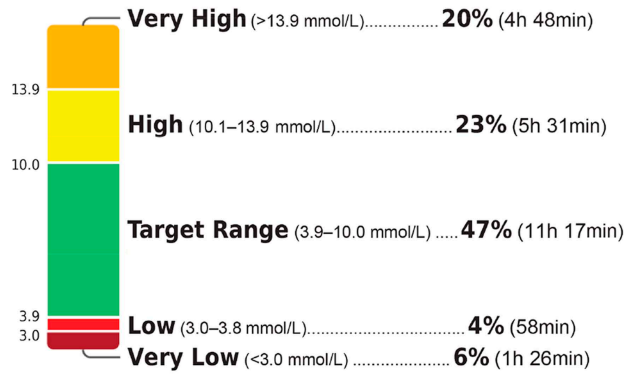

**AMBULATORY GLUCOSE PROFILE (AGP)**

AGP is a summary of glucose values from the report period, with median (50%) and other percentiles shown as if occurring in a single day.

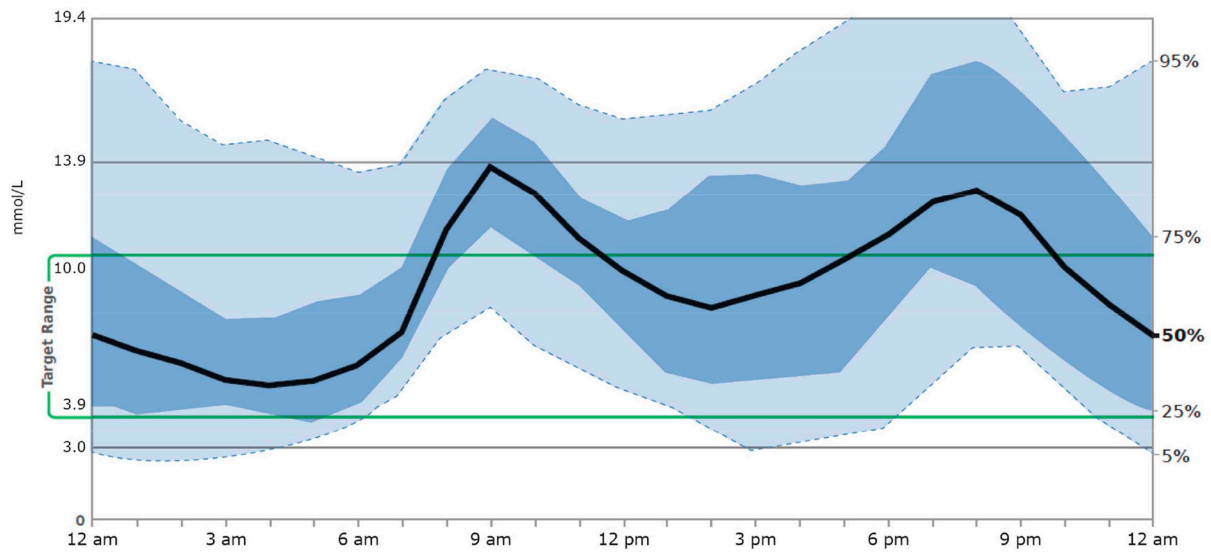

**DAILY GLUCOSE PROFILES**

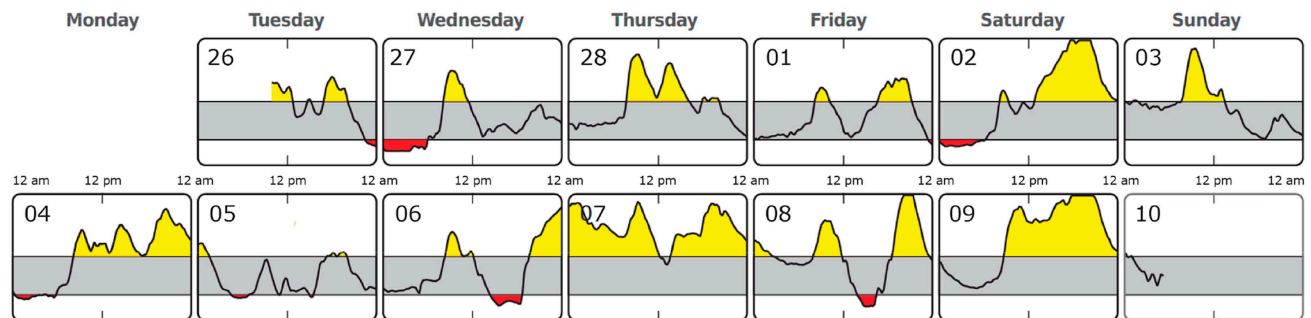

Each daily profile represents a midnight-to-midnight period.
